# Supplementary material for: The microcephaly gene Donson is essential for progenitors of cortical glutamatergic and GABAergic neurons
Source: PLoS Genet. 2021 Mar 19;17(3):e1009441. doi: 10.1371/journal.pgen.1009441 (PMC8011756; doi:10.1371/journal.pgen.1009441)
Supplement: S3 Table — The table shows the number of Olig2+ cells in the mantle zone of the lGE for Nkx2.1-cKO (cKO) and control mice at E14.5. Data are presented in percent of the control mean. (XLSX) [file pgen.1009441.s008.xlsx]

## Sheet: Tabelle1
S3 Table
Supplementary data table 3
	Olig2 positive cells in mantle zone at 14.5
	Control	Nkx2.1 cKO		P value (Unpaired t test, two-tailed)
	99.435	29.3785		0.0014
	128.814	47.4576
	90.3955	40.678		n= 2 biological repeats (2 technical repeats)
	81.3559	24.8588
Average	100	35.5932
