# Supplementary material for: The microcephaly gene Donson is essential for progenitors of cortical glutamatergic and GABAergic neurons
Source: PLoS Genet. 2021 Mar 19;17(3):e1009441. doi: 10.1371/journal.pgen.1009441 (PMC8011756; doi:10.1371/journal.pgen.1009441)
Supplement: S5 Table — The table shows the primary antibodies used in this study, their source and product number, the species they were raised in, and the dilution they were used at. Some antibodies were used at higher dilution when used with biotin tyramine enhancement (enhanced). (XLSX) [file pgen.1009441.s010.xlsx]

## Sheet: Tabelle1
S5 Table
Supplementary data table 5
Antibody	Source	Species	Dilution	Dilution
				(enhanced)
cleaved Caspase-3	Cell signaling (#9661)	Rabbit	500	5000
Reelin	R&D Systems (AF3820)	Goat		5000
Nestin	Abcam (#6320)	Rabbit		2500
Tbr1	Abcam (#31940)	Rabbit		8000
CTIP2	Abcam (#18465)	Goat		5000
Tbr2	Abcam (#183991)	Rabbit		10000
Ki67	Abcam (#16667)	Rabbit	200	2500
Pax6	Abcam (#5790)	Rabbit	250	2500
tdT	Chromotek (5F8)	Rat	500	5000
	Abcam (#62341)	Rabbit	500	5000
SATB2	Abcam (#92446)	Rabbit	100	5000
Olig2	Abcam (#109186)	Rabbit		2000
GAD65 + GAD67	Abcam (#183999)	Rabbit		20000
Gsh2	Millpore (ABN162)	Rabbit		1000
BLBP	Millpore (ABN14)	Rabbit		5000
BrdU	Abcam (#6326)	Rat		2000
